# Supplementary material
Source: PubMed Central journal article supplement (PMC2154455)

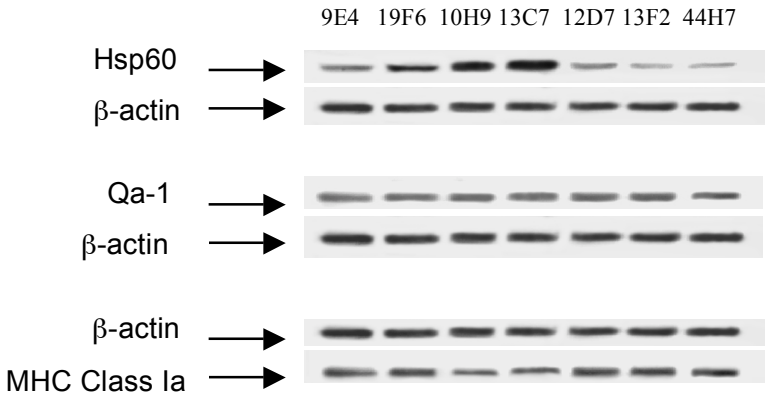

Supplement: supp_0709878104_09878Fig3.pdf [file supp_0709878104_09878Fig3.pdf]
